# Supplementary material for: Hydroxyapatite/L-Lysine Composite Coating as Glassy Carbon Electrode Modifier for the Analysis and Detection of Nile Blue A
Source: MDPI journal article supplement (doi:10.3390/ma15124262), 2022-06-16
Supplement: s1 [file s1]

## SUPPLEMENTARY MATERIAL

# Hydroxyapatite/L-Lysine Composite Coating as Glassy Carbon Electrode Modifier for the Analysis and Detection of Nile Blue A

Jimmy Julio Kouanang Ngouoko <sup>1</sup>, Kevin Yemele Tajeu <sup>1</sup>, Ranil Clément Tonleu Temgoua <sup>1,2</sup>, Giscard Doungmo <sup>3</sup>, Ingo Doench <sup>4,5,6,\*</sup>, Arnaud Kamdem Tamo <sup>4,5,6,\*</sup>, Théophile Kamgaing <sup>1</sup>, Anayancy Osorio-Madrado <sup>4,5,6,\*</sup> and Ignas Kenfack Tonle <sup>1,\*</sup>

<sup>1</sup> Department of Chemistry, Faculty of Science, University of Dschang, Dschang P.O. Box 67, Cameroon; ngouoalex@yahoo.com (J.J.K.N.); tasergekev@yahoo.fr (K.Y.T.); raniltemgoua@yahoo.fr (R.C.T.T.); theokamgaing@yahoo.fr (T.K.)

<sup>2</sup> Higher Teacher Training College, University of Yaoundé 1, Yaoundé P.O. Box 47, Cameroon

<sup>3</sup> Institute of Inorganic Chemistry, Christian-Albrechts-Universität zu Kiel, Max-Eyth-Straße 2, 24118 Kiel, Germany; gdoungmo@ac.uni-kiel.de (G.D.)

<sup>4</sup> Laboratory for Bioinspired Materials BMBT, Institute of Microsystems Engineering IMTEK-Sensors, University of Freiburg, 79110 Freiburg, Germany; ingo.doench@imtek.uni-freiburg.de (I.D.)

<sup>5</sup> Freiburg Center for Interactive Materials and Bioinspired Technologies FIT, University of Freiburg, 79110 Freiburg, Germany

<sup>6</sup> Freiburg Materials Research Center FMF, University of Freiburg, 79104 Freiburg, Germany

\* Correspondence: arnaud.kamdem@imtek.uni-freiburg.de (A.K.T.); anayancy.osorio@imtek.uni-freiburg.de (A.O.-M.); ignas.tonle@univ-dschang.org (I.K.T.); Tel.: +49-761-203-95096 (A.K.T.); +49-761-203-67363 (A.O.-M.); +237-696-141-545 (I.K.T.)

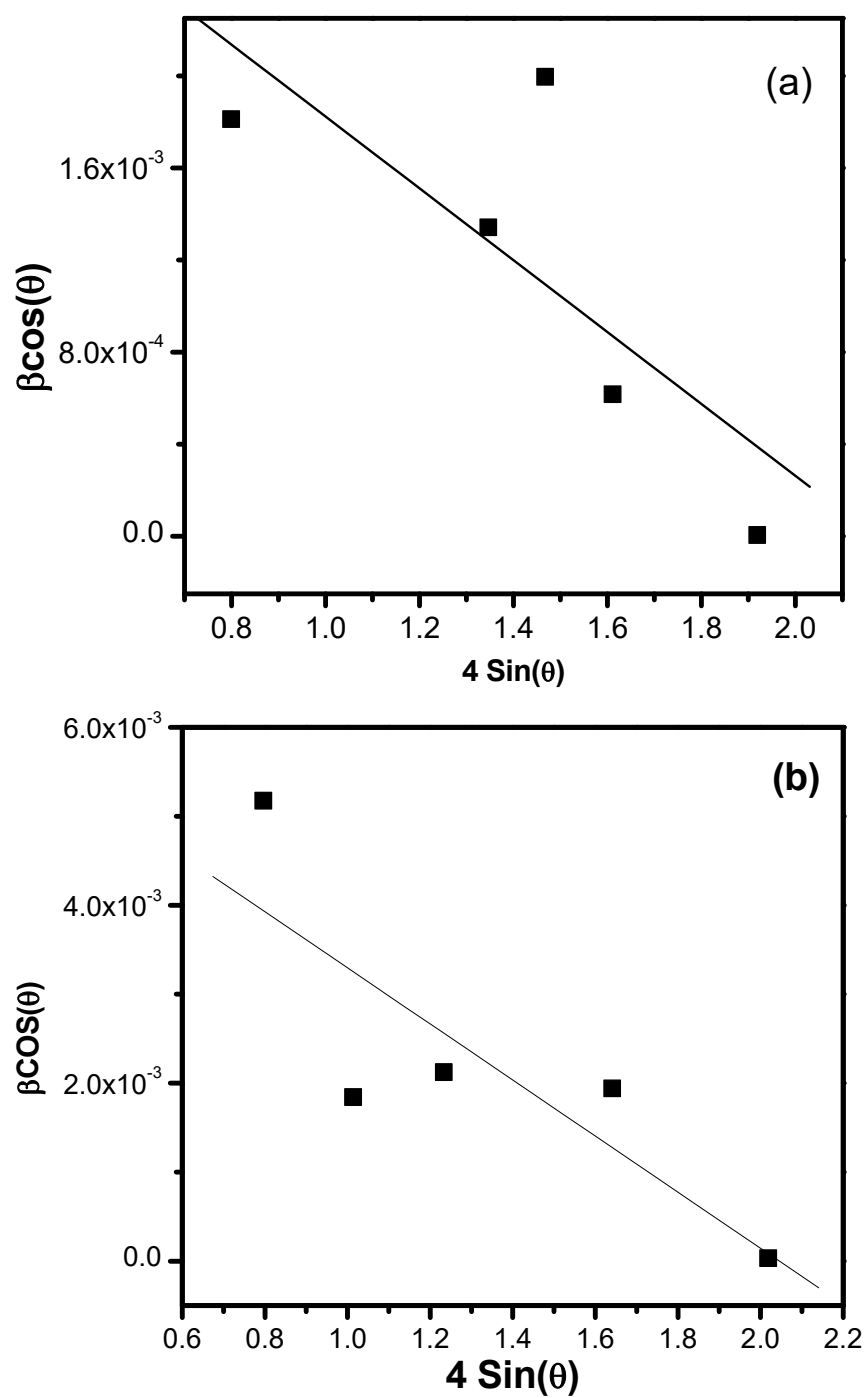

**Figure S1.** Williamson-Hall plots for (a) Lys/HA and (b) HA.

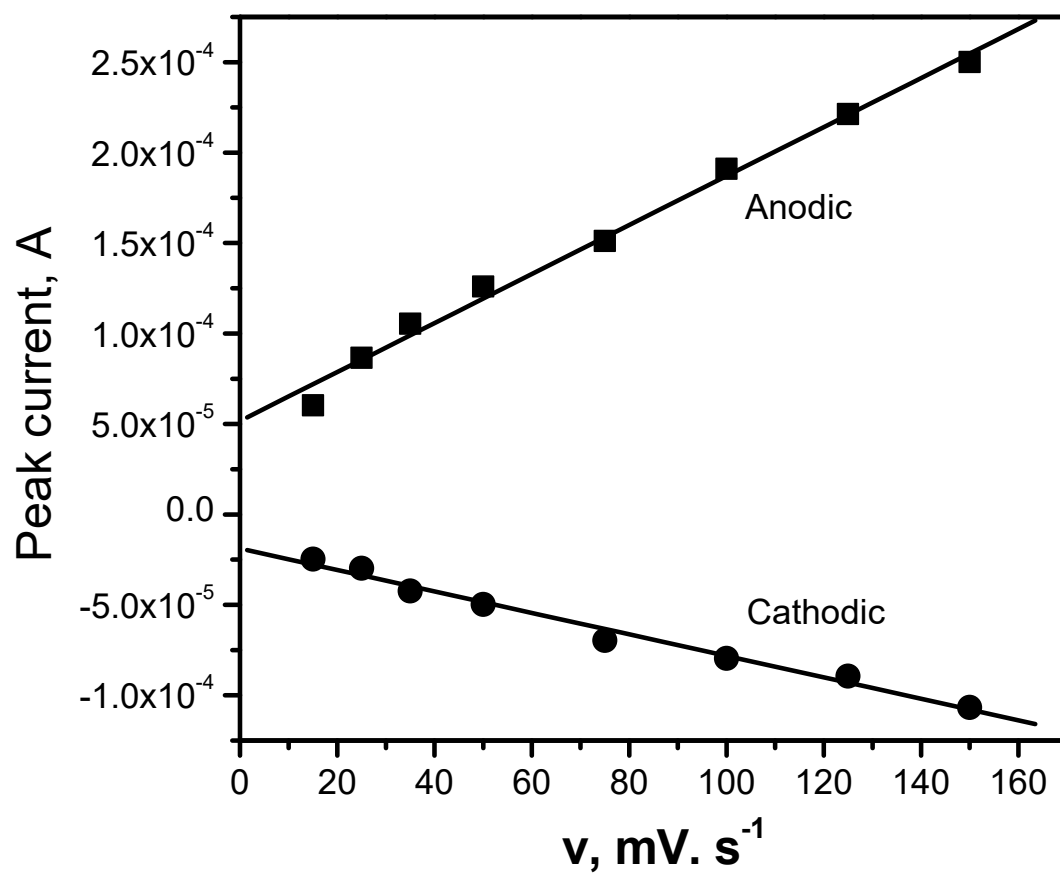

**Figure S2.** Plots of the anodic and cathodic peak currents as a function of the scan rate, recorded on GCE/Lys/HA in 0.1 M PBS (pH = 5.5) containing 1 mM of NBA. The scan rate was varied between 15 and 150  $\text{mV} \cdot \text{s}^{-1}$ .

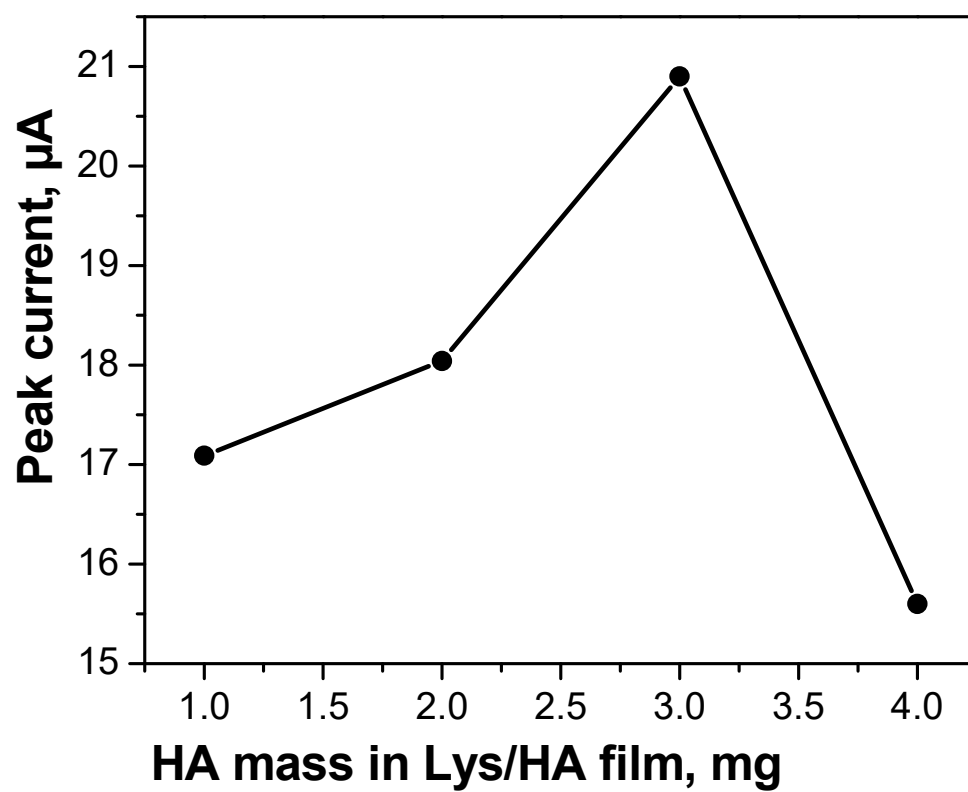

**Figure S3.** Effect of HA mass in the Lys/HA film on the DPV peak current of  $1\mu\text{M}$  of NBA, in in 0.1 M PBS (pH 5.5).
